# Supplementary material
Source: Springer Nature journal article supplement (https://www.springermedizin.de/resource/supplementary/12879_2012_1717_MOESM4_ESM.pdf/9443986)

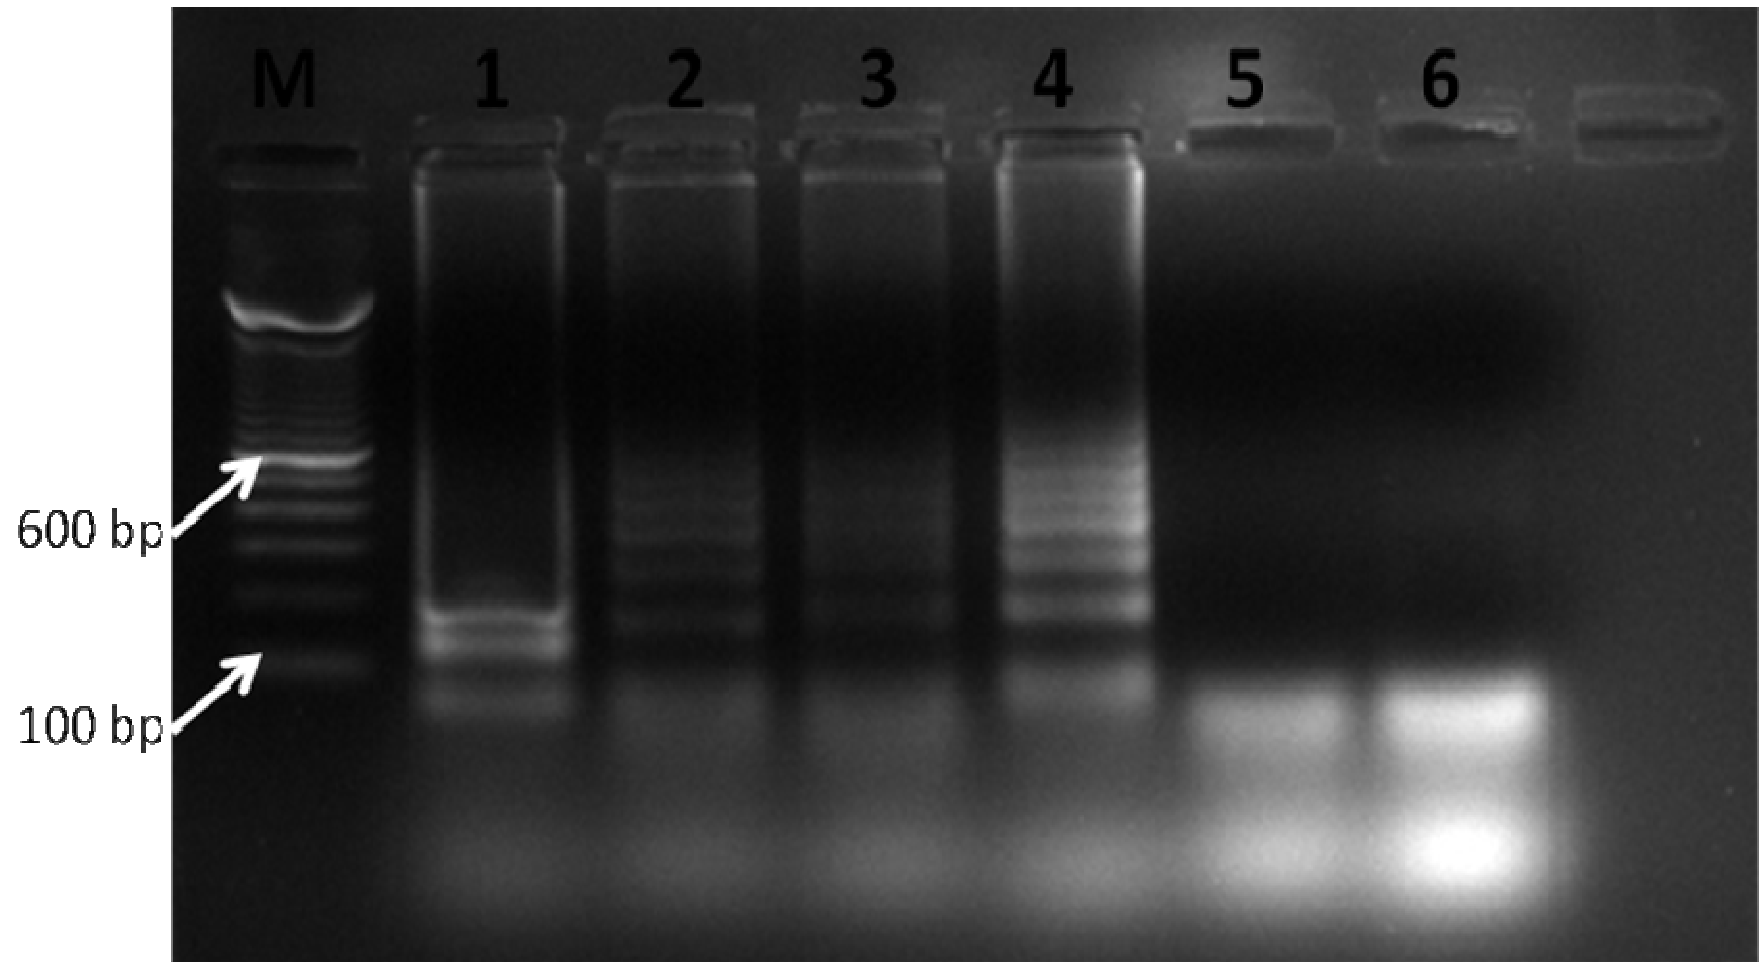

Supplement: MOESM4 [file 9443986]
